# Psychiatric Services

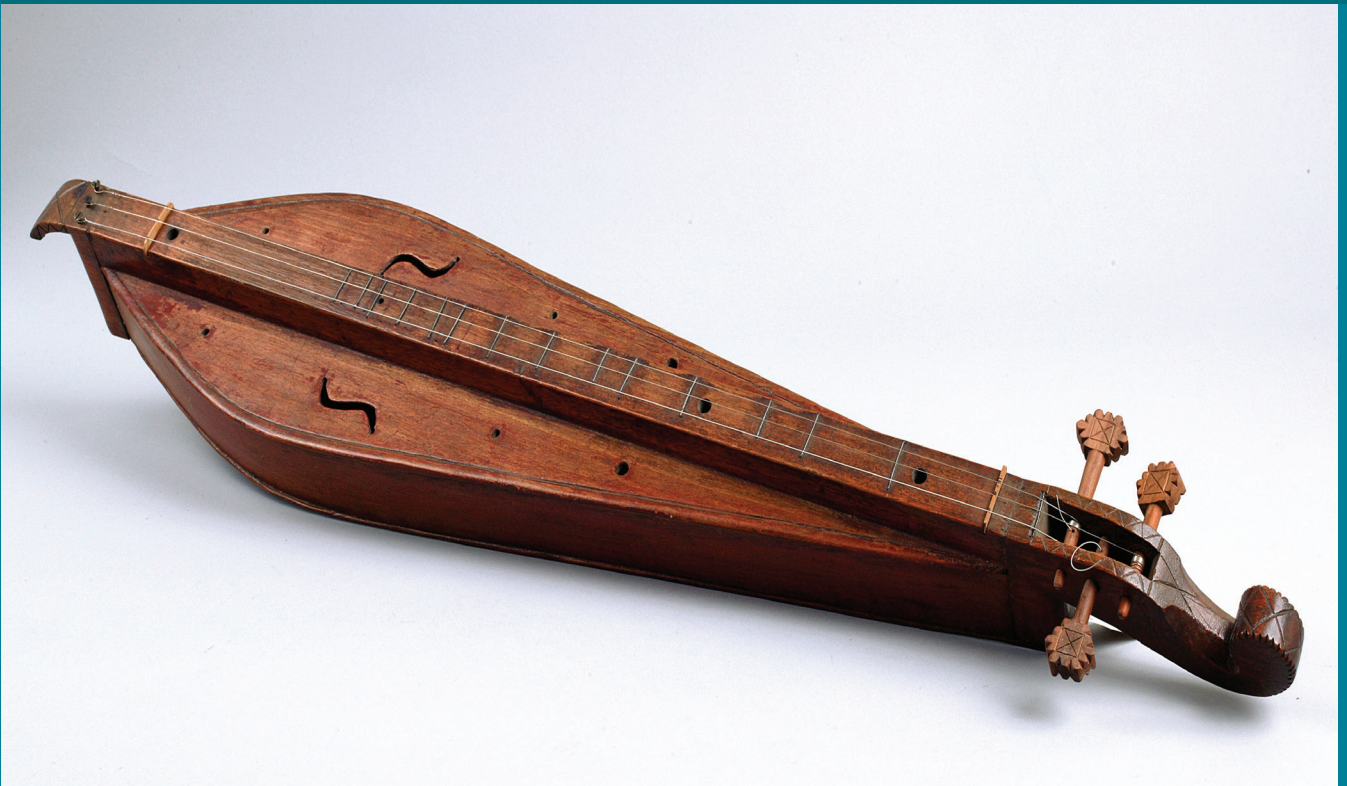

Expedited Medicaid enrollment after prison release: effects on recidivism

Contact between police and persons with mental disorders: a review of rates

The IPS learning community: a longitudinal study of programs in 13 states

“Deprescribing” psychotropic medications: guidelines and recommendations
